# Supplementary material for: Intra- and Interhemispheric Propagation of Electrophysiological Synchronous Activity and Its Modulation by Serotonin in the Cingulate Cortex of Juvenile Mice
Source: PubMed Central journal article supplement (PMC4773155; doi:10.1371/journal.pone.0150092), 2016-03-01
Supplement: pone.0150092.s001.pdf [file pone.0150092.s001.pdf]

## S1 Table

### S1 Table A

|          | <b>ipsilateral</b> |                   |                   |                   |                   | <b>contralateral</b> |                   |                   |                   |                    |
|----------|--------------------|-------------------|-------------------|-------------------|-------------------|----------------------|-------------------|-------------------|-------------------|--------------------|
|          | Recording site #1  | Recording site #2 | Recording site #3 | Recording site #4 | Recording site #5 | Recording site #6    | Recording site #7 | Recording site #8 | Recording site #9 | Recording site #10 |
| Slice #1 | 10.21              | 18.45             | 33.84             | 46.68             | 77.20             | 145.28               | 144.3             | 152.40            | 146.50            | 148.16             |
| Slice #2 | 6.98               | 19.68             | 24.57             | 32.76             | 41.69             | 49.47                | 56.13             | 62.91             | 72.22             | 80.99              |
| Slice #3 | 3.71               | 15.06             | 27.91             | 39.83             | 61.07             | 91.95                | 109.12            | 114.18            | 127.04            | 127.06             |
| Slice #4 | 4.58               | 13.66             | 22.93             | 28.01             | 37.85             | 38.07                | 37.96             | 46.60             | 57.83             | 68.60              |
| Slice #5 | 8.05               | 28.55             | 23.55             | 42.40             | 48.58             | 65.90                | 70.81             | 75.83             | 78.17             | 83.45              |
| Slice #6 | 10.68              | 21.60             | 30.64             | 42.50             | 54.35             | 78.14                | 88.02             | 96.88             | 118.24            | 107.56             |
| Slice #7 | 6.21               | 16.33             | 23.53             | 37.58             | 51.86             | 116.60               | 106.40            | 120.90            | 134.24            | 148.20             |

S1 Table B

|          | <b>ipsilateral</b> |                   |                   |                   |                   | <b>contralateral</b> |                   |                   |                   |                    |
|----------|--------------------|-------------------|-------------------|-------------------|-------------------|----------------------|-------------------|-------------------|-------------------|--------------------|
|          | Recording site #1  | Recording site #2 | Recording site #3 | Recording site #4 | Recording site #5 | Recording site #6    | Recording site #7 | Recording site #8 | Recording site #9 | Recording site #10 |
| Slice #1 | 5.09               | 11.91             | 14.81             | 22.02             | 32.25             | 34.63                | 36.71             | 39.32             | 41.71             | 44.43              |
| Slice #2 | 3.72               | 12.01             | 16.09             | 20.35             | 22.93             | 61.08                | 51.13             | 61.85             | 67.62             | 76.31              |
| Slice #3 | 5.23               | 8.65              | 11.13             | 17.39             | 18.69             | 34.98                | 33.45             | 31.75             | 35.66             | 34.35              |
| Slice #4 | 2.76               | 9.06              | 10.77             | 15.96             | 16.98             | 16.85                | 24.63             | 30.28             | 31.02             | 33.99              |
| Slice #5 | 4.98               | 11.20             | 15.44             | 18.21             | 20.15             | 62.04                | 61.10             | 51.61             | 46.73             | 33.73              |

S1 Table C

| <b>Latencies in slices at various rostro-caudal levels respect to bregma (in mm)</b> |        |                     |        |                       |        |                       |       |                       |       |
|--------------------------------------------------------------------------------------|--------|---------------------|--------|-----------------------|--------|-----------------------|-------|-----------------------|-------|
| <b>1.34/0.86 mm</b>                                                                  |        | <b>0.62/0.14 mm</b> |        | <b>-0.10/-0.58 mm</b> |        | <b>-0.82/-1.34 mm</b> |       | <b>-1.58/-1.82 mm</b> |       |
| Slice #1<br>(ms)                                                                     | 158.30 | Slice #1<br>(ms)    | 70.13  | Slice #1<br>(ms)      | 55.04  | Slice #1<br>(ms)      | 46.88 | Slice #1<br>(ms)      | 31.02 |
| Slice #2<br>(ms)                                                                     | 104.35 | Slice #2<br>(ms)    | 123.12 | Slice #2<br>(ms)      | 109.66 | Slice #2<br>(ms)      | 35.66 | Slice #2<br>(ms)      | 46.73 |
| Slice #3<br>(ms)                                                                     | 120.40 | Slice #3<br>(ms)    | 51.96  | Slice #3<br>(ms)      | 117.43 | Slice #3<br>(ms)      | 29.49 |                       |       |
| Slice #4<br>(ms)                                                                     | 95.86  | Slice #4<br>(ms)    | 87.50  | Slice #4<br>(ms)      | 74.63  |                       |       |                       |       |
| Slice #5<br>(ms)                                                                     | 160.84 | Slice #5<br>(ms)    | 81.44  | Slice #5<br>(ms)      | 91.80  |                       |       |                       |       |
| Slice #6<br>(ms)                                                                     | 106.23 | Slice #6<br>(ms)    | 84.81  | Slice #6<br>(ms)      | 77.02  |                       |       |                       |       |
|                                                                                      |        | Slice #7<br>(ms)    | 102.02 | Slice #7<br>(ms)      | 115.86 |                       |       |                       |       |
|                                                                                      |        | Slice #8<br>(ms)    | 89.07  | Slice #8<br>(ms)      | 36.83  |                       |       |                       |       |
|                                                                                      |        | Slice #9<br>(ms)    | 107.70 | Slice #9<br>(ms)      | 63.25  |                       |       |                       |       |
|                                                                                      |        | Slice #10<br>(ms)   | 122.15 | Slice #10<br>(ms)     | 41.71  |                       |       |                       |       |
|                                                                                      |        | Slice #11<br>(ms)   | 66.70  | Slice #11<br>(ms)     | 67.62  |                       |       |                       |       |
|                                                                                      |        | Slice #12<br>(ms)   | 71.48  | Slice #12<br>(ms)     | 42.69  |                       |       |                       |       |

|  |  |                   |        |                   |       |  |  |  |  |
|--|--|-------------------|--------|-------------------|-------|--|--|--|--|
|  |  | Slice #13<br>(ms) | 76.30  | Slice #13<br>(ms) | 75.64 |  |  |  |  |
|  |  | Slice #14<br>(ms) | 94.63  |                   |       |  |  |  |  |
|  |  | Slice #15<br>(ms) | 99.32  |                   |       |  |  |  |  |
|  |  | Slice #16<br>(ms) | 115.00 |                   |       |  |  |  |  |

**S1 Table.**

The Table gives the values of the latencies (in ms) of the synchronous responses recorded at different recording sites in anterior cingulate cortex (ACC) and retrosplenial cortex (RSC). **S1 Table A**; latencies of the responses recorded at the ACC (n = 7 slices). These values are averaged and shown in figure 3A of the main text. **S1 Table B**; latencies of the responses recorded at the RSC (n =5 slices). These values are averaged and shown in figure 3B of the main text. **S1 Table C**; latencies recorded at recording site #7 in slices from different rostro – caudal levels. The rostro-caudal levels are defined by the distance (in mm) respect to the bregma reference point, being positive values rostral to bregma and negative values caudal to bregma (n = 2-16 slices). These values are averaged and shown in figure 3C of the main text
