# Supplementary material for: Intra- and Interhemispheric Propagation of Electrophysiological Synchronous Activity and Its Modulation by Serotonin in the Cingulate Cortex of Juvenile Mice
Source: PubMed Central journal article supplement (PMC4773155; doi:10.1371/journal.pone.0150092), 2016-03-01
Supplement: pone.0150092.s002.pdf [file pone.0150092.s002.pdf]

## S2 Table

| <b>ACC</b><br>Recording<br>site #4 | <b>ACC</b><br>Recording<br>site #7 | <b>RSC</b><br>Recording<br>site #4 | <b>RSC</b><br>Recording<br>site #7 |
|------------------------------------|------------------------------------|------------------------------------|------------------------------------|
| 1.22                               | 1.61                               | 1.83                               | 0.49                               |
| 0.48                               | 2.17                               | 0.54                               | 1.25                               |
| 0.73                               | 3.19                               | 0.88                               | 0.28                               |
| 1.29                               | 1.19                               | 0.29                               | 2.64                               |
| 0.7                                | 1.11                               | 1.07                               | 2.25                               |
| 1.28                               | 3.03                               | 0.18                               | --                                 |
| 0.45                               | 2.89                               | 0.28                               | --                                 |
| 0.65                               | 1.82                               | --                                 | --                                 |
| 1.77                               | 3.21                               | --                                 | --                                 |
| 3.26                               | 1.85                               |                                    |                                    |
| 0.64                               | 1.99                               |                                    |                                    |
| 1.3                                | 0.79                               |                                    |                                    |
| 0.39                               | 2.18                               |                                    |                                    |
| 1.31                               | 4.06                               |                                    |                                    |
| 0.46                               | 3.06                               |                                    |                                    |
| 0.58                               | 1.56                               |                                    |                                    |
| 1.23                               | 2.56                               |                                    |                                    |
| 2.57                               | 1.15                               |                                    |                                    |
| 0.61                               | 4.88                               |                                    |                                    |
| 0.49                               | 11.68                              |                                    |                                    |
| 0.47                               | 5.03                               |                                    |                                    |
| 1.01                               | 10.54                              |                                    |                                    |
| 1.22                               | 4.51                               |                                    |                                    |
| 1.91                               | 3.38                               |                                    |                                    |
| 1.44                               | 1.46                               |                                    |                                    |
| 0.15                               | 7.05                               |                                    |                                    |
| 0.19                               | 8.11                               |                                    |                                    |
| 0.6                                | --                                 |                                    |                                    |
| 0.65                               |                                    |                                    |                                    |
| 3.14                               |                                    |                                    |                                    |
| 1.45                               |                                    |                                    |                                    |
| 2.33                               |                                    |                                    |                                    |
| 0.6                                |                                    |                                    |                                    |
| 1.49                               |                                    |                                    |                                    |
| 0.77                               |                                    |                                    |                                    |
| 1.31                               |                                    |                                    |                                    |
| 2.64                               |                                    |                                    |                                    |
| 0.39                               |                                    |                                    |                                    |
| 2.15                               |                                    |                                    |                                    |

0.92  
1.73  
0.46  
0.97  
2.88  
0.79  
2.02  
0.68  
0.88  
1.01  
0.33  
2.18  
0.81  
1.16  
1.83  
0.62

**S2 Table.**

Values (in ms) of the standard deviation (S.D.) of the latencies recorded in the anterior cingulate cortex (**ACC**) and retrosplenial cortex (**RSC**) at an ipsilateral recording site (recording site #4) and a contralateral recording site (recording site #7). Each value is the standard deviation of the latencies of ten consecutive responses recorded in one slice at the indicated recording site. The values in this table are averaged in figure 4C of the main text.
