# Supplementary material for: Intra- and Interhemispheric Propagation of Electrophysiological Synchronous Activity and Its Modulation by Serotonin in the Cingulate Cortex of Juvenile Mice
Source: PubMed Central journal article supplement (PMC4773155; doi:10.1371/journal.pone.0150092), 2016-03-01
Supplement: pone.0150092.s003.pdf [file pone.0150092.s003.pdf]

### S3 Table

#### S3 Table A

| ACC         |              |                |              |               |              |                |              |
|-------------|--------------|----------------|--------------|---------------|--------------|----------------|--------------|
| Ipsilateral |              |                |              | Contralateral |              |                |              |
|             | control      | 5 $\mu$ M 5-HT | washout      |               | control      | 5 $\mu$ M 5-HT | washout      |
|             | Latency (ms) | Latency (ms)   | Latency (ms) |               | Latency (ms) | Latency (ms)   | Latency (ms) |
| Slice #1    | 62.33        | 71.18          | 63.25        | Slice #1      | 140.62       | 209.77         | 157.25       |
| Slice #2    | 47.38        | 56.62          | 49.12        | Slice #2      | 121.60       | 216.85         | 148.8        |
| Slice #3    | 43.99        | 56.74          | 42.75        | Slice #3      | 87.50        | 119.08         | 92.43        |
| Slice #4    | 47.27        | 62.75          | 51.05        | Slice #4      | 74.03        | 80.79          | 74.35        |
| Slice #5    | 22.08        | 33.47          | 23.35        | Slice #5      | 89.07        | 114.10         | 88.15        |
| Slice #6    | 42.21        | 49.06          | 42.90        |               |              |                |              |
| Slice #7    | 36.50        | 39.58          | 36.10        |               |              |                |              |
| Slice #8    | 29.64        | 38.84          | 28.25        |               |              |                |              |

S3 Table B

| RSC         |              |                |              |               |              |                |              |
|-------------|--------------|----------------|--------------|---------------|--------------|----------------|--------------|
| Ipsilateral |              |                |              | Contralateral |              |                |              |
|             | control      | 5 $\mu$ M 5-HT | washout      |               | control      | 5 $\mu$ M 5-HT | washout      |
|             | Latency (ms) | Latency (ms)   | Latency (ms) |               | Latency (ms) | Latency (ms)   | Latency (ms) |
| Slice #1    | 26.03        | 29.25          | 29.25        | Slice #1      | 41.71        | 53.08          | 41.95        |
| Slice #2    | 33.02        | 40.12          | 40.12        | Slice #2      | 39.10        | 46.88          | 42.12        |
| Slice #3    | 35.98        | 42.05          | 42.05        | Slice #3      | 30.73        | 52.66          | 29.75        |
|             |              |                |              | Slice #4      | 63.25        | 70.32          | 62.50        |

S3 Table C

| ACC         |              |                |              |               |              |                |              |
|-------------|--------------|----------------|--------------|---------------|--------------|----------------|--------------|
| Ipsilateral |              |                |              | Contralateral |              |                |              |
|             | control      | 5 $\mu$ M 5-HT | washout      |               | control      | 5 $\mu$ M 5-HT | washout      |
|             | Latency S.D. | Latency S.D.   | Latency S.D. |               | Latency S.D. | Latency S.D.   | Latency S.D. |
|             | (ms)         | (ms)           | (ms)         |               | (ms)         | (ms)           | (ms)         |
| Slice #1    | 1.4          | 2.6            | 1.82         | Slice #1      | 1.63         | 3.08           | 1.93         |
| Slice #2    | 0.54         | 1.07           | 0.7          | Slice #2      | 1.47         | 2.43           | 2.31         |
| Slice #3    | 0.29         | 0.61           | 0.41         | Slice #3      | 1.46         | 2.64           | n.d.         |
| Slice #4    | 1.07         | 2.01           | 1.17         | Slice #4      | 4.45         | 12.13          | 6.01         |
| Slice #5    | 0.18         | 0.46           | 0.36         | Slice #5      | 4.31         | 13.03          | 5.68         |
| Slice #6    | 0.28         | 0.46           | 0.4          | Slice #6      | 1.57         | 3.93           | 2.35         |
|             |              |                |              | Slice #7      | 2.81         | 7.02           | 3.55         |

**S3 Table.**

Effect of the application of 5  $\mu$ M 5-HT on the latencies of the synchronous discharges recorded in the anterior cingulate cortex (ACC) and the retrosplenial cortex (RSC). **S3 Table A**, Effect of the application of 5  $\mu$ M 5-HT in Anterior Cingulate Cortex slices (values averaged and shown in figure 5C, upper panel, of the main text). Data in ms; n = 8 slices (ipsilateral), n = 5 slices (contralateral). **S3 Table B**; Effect of the application of 5  $\mu$ M 5-HT in Retrosplenial Cortex slices ((values averaged and shown in figure 5C, lower panel, of the main text). Data in ms; n = 3 slices (ipsilateral), n = 4 slices (contralateral). **S3 Table C**; Effect of the application of 5  $\mu$ M 5-HT on the standard deviation (S.D.) of the synchronous responses recorded in Anterior Cingulate Cortex slices ((values averaged and shown in figure 5D of the main text). Data in S3 Table C are the S.D. of the latencies measured in 10 consecutive responses for each condition; n = 6 slices (ipsilateral), n = 7 slices (contralateral).
