# Supplementary material for: Intra- and Interhemispheric Propagation of Electrophysiological Synchronous Activity and Its Modulation by Serotonin in the Cingulate Cortex of Juvenile Mice
Source: PubMed Central journal article supplement (PMC4773155; doi:10.1371/journal.pone.0150092), 2016-03-01
Supplement: pone.0150092.s004.pdf [file pone.0150092.s004.pdf]

## S4 Table

S4 Table A

|          | <b>Ipsilateral ACC</b> |                                 |                |
|----------|------------------------|---------------------------------|----------------|
|          | <b>control</b>         | <b>1 <math>\mu</math>M 5-HT</b> | <b>washout</b> |
|          | Latency (ms)           | Latency (ms)                    | Latency (ms)   |
| Slice #1 | 48.30                  | 48.94                           | 47.11          |
| Slice #2 | 32.06                  | 37.67                           | 34.83          |
| Slice #3 | 36.53                  | 36.76                           | 34.37          |
| Slice #4 | 37.63                  | 49.08                           | 43.22          |
| Slice #5 | 61.83                  | 62.08                           | 70.54          |
| Slice #6 | 44.74                  | 49.58                           | 46.25          |
| Slice #7 | 44.56                  | 47.66                           | 46.59          |
| Slice #8 | 39.58                  | 40.93                           | 36.30          |

S4 Table B

|          | <b>Contralateral ACC</b> |                                 |                |
|----------|--------------------------|---------------------------------|----------------|
|          | <b>control</b>           | <b>1 <math>\mu</math>M 5-HT</b> | <b>washout</b> |
|          | Latency (ms)             | Latency (ms)                    | Latency (ms)   |
| Slice #1 | 143.72                   | 144.56                          | 137.17         |
| Slice #2 | 68.52                    | 81.04                           | 75.36          |
| Slice #3 | 51.92                    | 53.44                           | 49.70          |
| Slice #4 | 42.48                    | 46.11                           | 45.55          |
| Slice #5 | 109.73                   | 124.48                          | 119.73         |
| Slice #6 | 29.43                    | 36.55                           | 29.93          |

**S4 Table.**

Effect of the application of 1  $\mu$ M 5-HT on the latencies (in ms) of the synchronous discharges recorded in the ipsilateral (**S4 Table A**; n = 8 slices) and contralateral (**S4 Table B**; n = 6 slices) hemispheres of the anterior cingulate cortex. Each latency values is the average of the latencies of the responses recorded in the last 3 minutes of each experimental condition. The averages of the values of this table are given in the main text.
