# Supplementary material for: Intra- and Interhemispheric Propagation of Electrophysiological Synchronous Activity and Its Modulation by Serotonin in the Cingulate Cortex of Juvenile Mice
Source: PubMed Central journal article supplement (PMC4773155; doi:10.1371/journal.pone.0150092), 2016-03-01
Supplement: pone.0150092.s005.pdf [file pone.0150092.s005.pdf]

## S5 Table

| <b>Ipsilateral</b> |                          |                |          |                          |                |          |                          |                |
|--------------------|--------------------------|----------------|----------|--------------------------|----------------|----------|--------------------------|----------------|
|                    | <b>Recording site #2</b> |                |          | <b>Recording site #3</b> |                |          | <b>Recording site #4</b> |                |
|                    | control                  | 5 $\mu$ M 5-HT |          | control                  | 5 $\mu$ M 5-HT |          | control                  | 5 $\mu$ M 5-HT |
|                    | Latency (ms)             | Latency (ms)   |          | Latency (ms)             | Latency (ms)   |          | Latency (ms)             | Latency (ms)   |
| Slice #1           | 14.19                    | 15.73          | Slice #1 | 31.21                    | 37.96          | Slice #1 | 62.33                    | 71.18          |
| Slice #2           | 20.82                    | 22.38          | Slice #2 | 25.18                    | 30.68          | Slice #2 | 46.675                   | 56.62          |
|                    |                          |                | Slice #3 | 27.88                    | 31.88          | Slice #3 | 43.99                    | 56.74          |
|                    |                          |                |          |                          |                | Slice #4 | 32.76                    | 39.58          |
|                    |                          |                |          |                          |                | Slice #5 | 47.27                    | 62.75          |
|                    |                          |                |          |                          |                | Slice #6 | 28.13                    | 29.36          |
|                    |                          |                |          |                          |                | Slice #7 | 36.89                    | 35.2           |
|                    |                          |                |          |                          |                | Slice #8 | 46.12                    | 54.28          |

### S5 Table.

Latency data used to calculate the effect of 5-HT on the propagation velocity (main text, figure 6C). The table gives the latencies (in ms) of the recorded responses obtained in control condition and in the presence of 5  $\mu$ M 5-HT in recording sites #2 (2 slices), #3 (3 slices) and #4 (8 slices).
