# Supplementary material for: Intra- and Interhemispheric Propagation of Electrophysiological Synchronous Activity and Its Modulation by Serotonin in the Cingulate Cortex of Juvenile Mice
Source: PubMed Central journal article supplement (PMC4773155; doi:10.1371/journal.pone.0150092), 2016-03-01
Supplement: pone.0150092.s006.pdf [file pone.0150092.s006.pdf]

## S6 Table

|          | control | 5 $\mu$ M 5-HT | washout |
|----------|---------|----------------|---------|
|          | (ms)    | (ms)           | (ms)    |
| Slice #1 | 92.17   | 170.12         | 88.17   |
| Slice #2 | 74.45   | 142.55         | 84.01   |
| Slice #3 | 43.10   | 76.18          | 50.18   |

### **S6 Table.**

Effect of the application of 5  $\mu$ M 5-HT on the interhemispheric propagation delay. The table gives in ms the interhemispheric propagation delay measured in three slices in control conditions, during the application of 5  $\mu$ M 5-HT and during the washout of the 5-HT. In each slice, the interhemispheric propagation delay was calculated as difference in the latency of the discharges recorded in recording site #4 (ipsilateral) and recording site #7 (contralateral). The data in this table are averaged and compared in figure 7B of the main text.
