# Supplementary material for: Intra- and Interhemispheric Propagation of Electrophysiological Synchronous Activity and Its Modulation by Serotonin in the Cingulate Cortex of Juvenile Mice
Source: PubMed Central journal article supplement (PMC4773155; doi:10.1371/journal.pone.0150092), 2016-03-01
Supplement: pone.0150092.s007.pdf [file pone.0150092.s007.pdf]

## S7 Table

S7 Table A

| <b>8-OH-DPAT</b>   |              |                  |              |                      |              |                  |              |
|--------------------|--------------|------------------|--------------|----------------------|--------------|------------------|--------------|
| <b>Ipsilateral</b> |              |                  |              | <b>Contralateral</b> |              |                  |              |
|                    | control      | <b>8-OH-DPAT</b> | washout      |                      | control      | <b>8-OH-DPAT</b> | washout      |
|                    | Latency (ms) | Latency (ms)     | Latency (ms) |                      | Latency (ms) | Latency (ms)     | Latency (ms) |
| Slice #1           | 43.61        | 41.42            | 42.23        | Slice #1             | 118.67       | 120.80           | 119.92       |
| Slice #2           | 21.99        | 21.62            | 25.63        | Slice #2             | 63.11        | 63.68            | 63.36        |
| Slice #3           | 48.61        | 57.05            | 57.66        | Slice #3             | 139.22       | 142.95           | 142.38       |
| Slice #4           | 19.23        | 21.88            | 23.12        | Slice #4             | 42.85        | 43.73            | N.d.         |

S7 Table B

| DOI         |              |              |              |               |              |              |              |
|-------------|--------------|--------------|--------------|---------------|--------------|--------------|--------------|
| Ipsilateral |              |              |              | Contralateral |              |              |              |
|             | control      | DOI          | washout      |               | control      | DOI          | washout      |
|             | Latency (ms) | Latency (ms) | Latency (ms) |               | Latency (ms) | Latency (ms) | Latency (ms) |
| Slice #1    | 37.41        | 49.73        | 57.08        | Slice #1      | 91.8         | 117.34       | 103.39       |
| Slice #2    | 11.34        | 12.71        | 13.74        | Slice #2      | 42.69        | 58.24        | 46.13        |
| Slice #3    | 34.38        | 29.93        | 29.8         | Slice #3      | 77.02        | 75.57        | 78.56        |
| Slice #4    | 30.18        | 42.93        | 33.56        | Slice #4      | 36.83        | 37.74        | 33.64        |
| Slice #5    | 41.56        | 45.46        | 47.48        | Slice #5      | 107.70       | 133.70       | 154.88       |
| Slice #6    | 14.13        | 14.59        | 15.75        | Slice #6      | 30.13        | 42.88        | 37.61        |
| Slice #7    | 35.25        | 32.66        | 30.38        | Slice #7      | 124.35       | 143.42       | 134.20       |
| Slice #8    | 19.31        | 17.50        | 16.17        | Slice #8      | 58.21        | 62.44        | 58.48        |
| Slice #9    | 28.51        | 26.05        | 27.76        | Slice #9      | 49.63        | 63.30        | N.d.         |
| Slice #10   | 53.33        | 58.63        | 58.18        | Slice #10     | 32.27        | 34.59        | 34.80        |
| Slice #11   | 15.35        | 15.12        | 15.14        |               |              |              |              |
| Slice #12   | 15.32        | 16.11        | 15.54        |               |              |              |              |
| Slice #13   | 31.55        | 37.63        | 24.89        |               |              |              |              |
| Slice #14   | 12.88        | 13.93        | 11.08        |               |              |              |              |
| Slice #15   | 39.76        | 42.25        | 48.65        |               |              |              |              |
| Slice #16   | 19.77        | 24.53        | 22.09        |               |              |              |              |
| Slice #17   | 47.45        | 58.63        | 55.45        |               |              |              |              |
| Slice #18   | 25.03        | 26.18        | 25.19        |               |              |              |              |
| Slice #19   | 27.42        | 28.24        | N.d.         |               |              |              |              |
| Slice #20   | 18.45        | 20.00        | 20.54        |               |              |              |              |

|           |       |       |       |  |  |  |  |
|-----------|-------|-------|-------|--|--|--|--|
| Slice #21 | 42.42 | 49.02 | 42.75 |  |  |  |  |
| Slice #22 | 26.66 | 29.95 | 26.69 |  |  |  |  |

S7 Table C

| CP 93129    |              |              |              |               |              |              |              |
|-------------|--------------|--------------|--------------|---------------|--------------|--------------|--------------|
| Ipsilateral |              |              |              | Contralateral |              |              |              |
|             | control      | CP 93129     | washout      |               | control      | CP 93129     | washout      |
|             | Latency (ms) | Latency (ms) | Latency (ms) |               | Latency (ms) | Latency (ms) | Latency (ms) |
| Slice #1    | 70.11        | 62.74        | 67.21        | Slice #1      | 100.58       | 166.36       | 163.16       |
| Slice #2    | 20.69        | 23.61        | 21.50        | Slice #2      | 93.51        | 100.22       | 92.66        |
| Slice #3    | 46.83        | 60.78        | 65.41        | Slice #3      | 96.97        | 124.04       | 117.84       |
| Slice #4    | 30.83        | 32.62        | 30.89        | Slice #4      | 102.54       | 129.94       | 116.1        |
| Slice #5    | 12.38        | 12.86        | 13.11        | Slice #5      | 144.92       | 231.44       | N.d.         |
| Slice #6    | 59.30        | 68.27        | 59.91        | Slice #6      | 101.14       | 155.56       | 161.22       |
| Slice #7    | 16.72        | 18.24        | 17.98        |               |              |              |              |
| Slice #8    | 32.03        | 36.40        | 33.83        |               |              |              |              |
| Slice #9    | 40.75        | 43.11        | 38.76        |               |              |              |              |
| Slice #10   | 23.85        | 26.81        | 22.66        |               |              |              |              |
| Slice #11   | 35.85        | 37.20        | 39.83        |               |              |              |              |
| Slice #12   | 40.12        | 45.98        | 48.03        |               |              |              |              |

**S7 Table.**

Effect of 5-HT receptor agonists on the latencies (in ms) of synchronous discharges. **S7 Table A**; Effect of 8-OH-DPAT on Anterior Cingulate Cortex slices (ipsilateral n = 4 slices, contralateral n = 4 slices). These data are averaged and shown in figure 8B, upper panel, of the main text. **S7 Table B**; effect of DOI on Anterior Cingulate Cortex slices (ipsilateral n = 22 slices, contralateral n = 10 slices). These data are averaged and shown in figure 8B, middle panel, of the main text. **S7 Table C**; effect of CP 93129 on Anterior Cingulate Cortex slices (ipsilateral n = 12 slices, contralateral n = 6 slices). These data are averaged and shown in figure 8B, lower panel, of the main text. In all tables: N.d. data not measured.
